# Post-transcriptional regulation of *Xwnt-8* expression is required for normal myogenesis during vertebrate embryonic development

Qi Tian, Takuya Nakayama, Michael P. Dixon and Jan L. Christian\*

Department of Cell and Developmental Biology, L215, Oregon Health Sciences University, School of Medicine, 3181 SW Sam Jackson Park Road, Portland, OR 97201-3098, USA

\*Author for correspondence (e-mail: christia@ohsu.edu)

Accepted 21 May; published on WWW 5 July 1999

## SUMMARY

The *Xenopus Wnt-8* gene is transiently expressed in ventral and lateral mesoderm during gastrulation and plays a critical role in patterning these tissues. In the current study, we show that the spatial and temporal pattern of expression of endogenous *Xwnt-8* is regulated, in part, at a post-transcriptional level. We have identified a novel sequence element in the 3' untranslated region of the *Xwnt-8* RNA that controls the polyadenylation status of reporter and endogenous *Xwnt-8* RNAs, directs rapid RNA degradation beginning precisely at the early gastrula stage, and represses translation of transcripts throughout development. Expression of endogenous *Xwnt-8* is normally

downregulated within lateral (presomitic) mesoderm following gastrulation. We demonstrate that rapid degradation of *Xwnt-8* transcripts, mediated by these regulatory elements in the 3' untranslated region, is essential to this process and that downregulation is required to prevent overcommitment of somitic cells to a myogenic fate. These studies demonstrate a role for post-transcriptional regulation of zygotic gene expression in vertebrate embryonic patterning.

Key words: *Xenopus*, *Xwnt-8*, RNA stability, Myogenesis

## INTRODUCTION

Wnts are a family of structurally related, secreted proteins that mediate cell-cell signaling. Members of this family play important roles in a number of basic developmental processes including embryonic induction, specification of cell fate and determination of cell polarity (reviewed by Parr and McMahon, 1994; Brown and Moon, 1998; Wodarz and Nusse, 1998).

Within a given vertebrate species, multiple *Wnt* genes have been identified that are expressed in spatially and temporally distinct, yet often overlapping patterns in the embryo. The dynamic pattern of expression of many *Wnts* suggests that individual gene products are likely to function repeatedly throughout development in patterning distinct organ systems. Indeed, loss-of-function mutations in *Wnt* genes in the mouse have identified multiple unique, as well as partially redundant roles for individual *Wnt* family members. Murine *Wnt-1*, for example, is essential for midbrain patterning (McMahon and Bradley, 1990; Thomas and Capecchi, 1990), and *Wnt-3a* for formation of axial mesoderm (Takada et al., 1994), while both of these genes play a redundant role in promoting proliferation of cell types derived from the dorsal neural tube (Ikeya et al., 1997) and in regulating formation of the dermomyotome (Ikeya and Takada, 1998).

The apparent functional redundancy of some Wnts suggests that multiple members of the *Wnt* family can activate a common intracellular signal transduction pathway. Consistent with this

possibility, several independent assays have identified at least two functionally distinct categories of Wnts, exemplified by *Wnt-1* and *Wnt-5a* (Moon et al., 1997; Wodarz and Nusse, 1998). The *Wnt-1* class is defined by the ability to transform C57mg murine mammary epithelial cells, and/or to induce formation of a secondary dorsal axis when misexpressed in *Xenopus* embryos. In contrast, the *Wnt-5a* class is unable to transform mammary epithelial cells or to induce a complete axis duplication, but instead produces distinct phenotypic defects when misexpressed in *Xenopus* embryos.

As with other families of multifunctional developmental regulators, the expression and bioactivity of *Wnt* proteins is tightly regulated. For example, a number of secreted antagonists of *Wnt* signaling, including cerberus, dickkopf-1 and frizzled related proteins (FRPS), have been identified that appear to function in the extracellular space to prevent Wnts from binding to and activating their cognate receptors (reviewed in Brown and Moon, 1998; Wodarz and Nusse, 1998). In addition, the function of porcupine, a protein resident in the endoplasmic reticulum, is required for production of bioactive wingless (*Drosophila Wnt-1*) protein (Kadowaki et al., 1996). Genetic studies have also revealed a requirement for proteoglycans in wingless signaling (Wodarz and Nusse, 1998). These many checkpoints on *Wnt* activity presumably operate to ensure that individual Wnts are active only when and where they should be, thereby preventing inappropriate tissue patterning or cell type specification.

In the current studies, we explore a further regulatory mechanism that operates to modulate expression of the *Xenopus Wnt (Xwnt)-8* gene. *Xwnt-8* is a member of the *Wnt-1* subclass and, accordingly, can induce the formation of a secondary dorsal axis when misexpressed in early *Xenopus* embryos (Christian et al., 1991; Smith and Harland, 1991; Sokol et al., 1991). Endogenous *Xwnt-8* is not present at the proper time or place to function in early dorsal patterning, but is transiently expressed in ventral and lateral mesoderm during gastrulation. By the early neurula stage, *Xwnt-8* transcripts can no longer be detected in lateral mesodermal cells, but persist in ventral cells at least until the tailbud stage (Christian and Moon, 1993). Both gain-of-function and loss-of-function studies have shown that *Xwnt-8* plays an important role in specifying ventral and lateral fate within the newly induced mesoderm. Ectopic expression of *Xwnt-8* in extreme dorsal mesoderm (prospective notochord) during gastrulation causes these cells to adopt a more ventral fate such that they differentiate as muscle, and causes a secondary loss of anterior structures (Christian and Moon, 1993). Conversely, blocking *Xwnt-8* function leads to an enlarged head and to overcommitment to dorsal (notochordal) fate at the expense of lateral mesodermal (muscle) fate (Hoppler et al., 1996; Hoppler and Moon, 1998).

The dramatic patterning defects caused by deregulation of *Xwnt-8* function demonstrate that proper temporal and spatial control of its activity is critical for normal embryonic development. Here, we show that expression of *Xwnt-8* is negatively regulated in vivo at the level of RNA stability and translation and that post-transcriptional regulation of *Xwnt-8* expression is required for normal embryonic patterning.

## MATERIALS AND METHODS

### Embryo culture and manipulation

*Xenopus* eggs were obtained, and embryos were injected and cultured as described (Moon and Christian, 1989). Embryos were staged according to Nieuwkoop and Faber (1967). Animal caps were isolated and cultured as described (Cui et al., 1996).

### Plasmid construction and RNA synthesis

The *Xwnt-8* cDNA used to generate synthetic RNA in previous studies (pSP64T-*Xwnt-8*; Christian et al., 1991) includes the first 290 nucleotides of the 3' UTR. pSP64T-X8/UTR- was generated by truncating this cDNA at an *AvaI* site, thereby removing all but the first 30 nucleotides of the 3' UTR. pSP64T-Vim/UTR+ was generated by subcloning the 3' *AvaI-EcoRI* fragment of the *Xwnt-8* cDNA downstream of sequence encoding a mutant, myc-tagged form of Vimentin (Vim/UTR-, originally designated V5ΔC-myc, Christian et al., 1990). In order to generate pCS2-UTR derivatives, cDNAs containing portions of the *Xwnt-8* UTR were isolated using restriction sites that were naturally present in the 3' UTR of *Xwnt-8* cDNAs, or that were introduced by PCR. These fragments were subcloned downstream of myc coding sequence in the vector pCS2+MT or were subcloned in antisense orientation into the vector pCS2+ (Turner and Weintraub, 1994). Capped synthetic RNA was generated by in vitro transcription of linearized templates using a Megascript kit (Ambion).

### Immunostaining, in situ hybridization and histological analysis

Whole-mount immunostaining, using monoclonal antibody 12/101 to detect muscle and monoclonal antibody 9E10 to detect the myc-epitope, was performed as described (Moon and Christian, 1989). Following immunostaining, some embryos were embedded in paraffin,

and 20 μm-thick sections were cut and counterstained with eosin for histological analysis (Christian and Moon, 1993). Whole-mount in situ hybridization was performed as described (Nakayama et al., 1998).

### Analysis of molecular markers by RT-PCR

RNA was isolated from ten pooled animal caps and reverse transcription-polymerase chain reaction (RT-PCR) analysis was performed as described (Cui et al., 1996; Nakayama et al., 1998) using the following PCR conditions: 94°C for 5 minutes, followed by a variable number of cycles (determined empirically to be in the linear range for each primer pair using RT product of control embryo RNA) at 94°C for 30 seconds, 55°C for 30 seconds and 72°C for 30 seconds. The sequences of *EF1-α*, *N-CAM*, *α-actin*, *OtxA*, *Xslug* and *Xlhbbox6* primers have been reported (Chang and Hemmati-Brivanlou, 1998). PCR products were visualized with a Molecular Dynamics phosphorimager.

### Northern blot hybridization

RNA was extracted from embryos and analyzed by northern hybridization as described (Christian et al., 1991).

### RNA extraction from polysomal and nonpolysomal fractions

20 embryos were homogenized in 500 μl of polysome buffer (300 mM KCl, 2 mM MgCl<sub>2</sub>, 20 mM Tris-HCl, pH 7.4, 4 μg/ml polyvinyl sulfate, 0.05% (V/V) sodium deoxycholate, 2 mM dithiothreitol, 100 units/ml RNasin and 0.2 mM cycloheximide) and centrifuged at 12,000 g for 15 minutes at 4°C. Supernatants were layered over a step gradient of 10% sucrose (0.5 ml) and 35% sucrose (0.5 ml) in polysome buffer and centrifuged at 100,000 g for 2 hours at 4°C. For EDTA control groups, supernatants and sucrose/polysome buffer was adjusted to 20 mM EDTA and cycloheximide was omitted. RNA was ethanol precipitated from supernatants and then extracted from both fractions by suspension in 0.5 ml guanidine isothiocyanate solution (4 M guanidine isothiocyanate, 50 mM Tris, pH 7.6, 5 mM EDTA, 0.5% SDS, and 0.1 M β-mercaptoethanol), followed by phenol/chloroform extraction and ethanol precipitation. RNA pellets were re-extracted with 1 ml of Tri Reagent (Sigma), precipitated with ethanol and resuspended in 40 μl of DEPC-treated H<sub>2</sub>O. 6 μl of each RNA was analyzed by northern hybridization to radiolabeled riboprobes.

### Western blot analysis

Proteins were extracted from embryos as described (Moon and Christian, 1989), separated by SDS-polyacrylamide gel electrophoresis, and transferred to PVDF membrane. Membranes were incubated with monoclonal antibody 9E10, followed by horseradish-peroxidase-conjugated secondary antibody and chemiluminescent detection using an ECL kit (Pierce). The same membrane was stripped and re-probed with a polyclonal anti-spectrin antibody (gift of R. Moon).

### RT-PCR-based polyadenylation assay

RNA was extracted from embryos and reverse transcribed using an *XhoI* adapter/oligo(dT) primer (Stragene). cDNA was amplified using primers specific for *XhoI* linker sequence and for sequence present in the 3' UTR of *Xwnt-8* (5'-AGGTGGTCTGTTGTAAAT-3') using the following PCR conditions: 94°C for 5 minutes followed by 35 cycles of 94°C for 1 minute, 55°C for 1 minute and 72°C for 1 minute. Southern blots of PCR products were hybridized with a radiolabeled cDNA probe specific for the 3' UTR of *Xwnt-8*.

## RESULTS

### Deletion of untranslated sequence from the *Xwnt-8* RNA alters its activity in vivo

Injection of 5-20 pg of a synthetic *Xwnt-8* RNA that includes

the 3' untranslated region (X8/UTR+) into ventral cells of *Xenopus* embryos induced the formation of a secondary dorsal axis in 98% of injected embryos and this axis contained a complete set of anterior structures in 76% of injected embryos ( $n=148$ ; Fig. 1A). Ventral injection of 5–20 pg of an *Xwnt-8* RNA that lacks most of the 3' untranslated region (X8/UTR-) also induced formation of a secondary dorsal axis in 93% of injected embryos ( $n=116$ ; arrow, Fig. 1B), but this axis was anteriorly truncated. Injection of up to 1 ng of X8/UTR+ RNA into dorsal cells of cleaving embryos produced no apparent patterning defects in 80% of embryos ( $n=88$ , Fig. 1C) and led to enlargement of the cement gland in others (data not shown). In contrast, dorsal injection of as little as 20 pg of X8/UTR- RNA led to a loss of anterior structures in 96% of embryos ( $n=114$ ; Fig. 1D). Histological analysis demonstrated that many of the anteriorly truncated primary and secondary dorsal axes in embryos injected with X8/UTR- lacked notochord (data not shown). The phenotypic defects caused by dorsal injection of X8/UTR- RNA are identical to those observed in embryos made to ectopically express *Xwnt-8* after the onset of zygotic gene expression at the midblastula transition (MBT, Christian and Moon, 1993). These defects are not produced by injection of X8/UTR+ RNA, raising the possibility that regulatory elements in the 3' UTR destabilize or inhibit translation of these transcripts after the midblastula stage.

To further test the hypothesis that the 3' UTR of the *Xwnt-8* RNA can negatively regulate *Xwnt-8* activity in vivo, we directly compared the ability of *Xwnt-8* protein translated from microinjected X8/UTR+ and X8/UTR- RNAs to posteriorize neural tissue and to induce neural crest. Previous studies have shown that *Xenopus* ectodermal explants form neural tissue that is anterior in character when made to ectopically express the BMP antagonist, noggin. This tissue can be repatterned as posterior, or converted to neural crest, by addition of members of the Wnt-1 class of proteins (McGrew et al., 1995; Saint-Jeannet et al., 1997; Chang and Hemmati-Brivanlou, 1998; LaBonne and Bronner-Fraser, 1998). Since these Wnt-dependent patterning events take place during gastrulation, they provide sensitive assays for Wnt function after the midblastula stage.

RNA encoding noggin (150 pg) was injected either alone, or together with X8/UTR+ or X8/UTR- RNA (10 pg), into 2-cell embryos as illustrated above Fig. 2. At the blastula stage, ectodermal explants (animal caps) were isolated, cultured until sibling embryos reached the tailbud stage (stage 25) and analyzed for expression of specific marker genes by semiquantitative RT-PCR. Injection of noggin (Nog) RNA induced the expression of the general and anterior neural-specific genes, *NCAM* and *OtxA*, respectively, but did not induce expression of markers of posterior neural tissue (*Xlhbbox6*), neural crest (*Xslug*) or dorsal mesoderm (*muscle actin*) (Fig. 2A). This pattern of gene expression was not altered when X8/UTR+ RNA was co-injected along with noggin except that expression of *Xlhbbox6* was weakly induced. In contrast, co-injection of X8/UTR- RNA

along with noggin led to a marked suppression of expression of the anterior neural gene, *OtxA*, and to a concomitant induction of expression of posterior neural (*Xlhbbox6*) and neural crest (*Xslug*) genes.

We also compared the ability of X8/UTR- and X8/UTR+ to specify neural crest in whole embryos, using *Xtwist* as a marker. X8/UTR+ or X8/UTR- RNA (10 pg) was injected near the animal pole of one blastomere of 2-cell embryos and expression of *Xtwist* was analyzed by in situ hybridization at the midneurula stage (stage 17). X8/UTR+-injected embryos (Fig. 2B, left panel) showed symmetric expression of *Xtwist* along the lateral edges of the anterior neural plate in the prospective neural crest region, as did uninjected embryos (data not shown). In contrast, injection of X8/UTR- RNA led to a unilateral expansion of the *Xtwist* expression domain (Fig. 2B, right panel, arrow). Collectively, these results demonstrate that protein translated from injected *Xwnt-8* transcripts containing the 3' UTR can act prior to the midblastula stage to induce dorsal development, but is much less active or is inactive in patterning neural tissue, which occurs after the onset of gastrulation. *Xwnt-8* alone, among various members of the Wnt-1 class of gene products, has been reported to be incapable of posteriorizing neural tissue or inducing neural crest (Saint-Jeannet et al., 1997; Chang and Hemmati-Brivanlou, 1998). This may be due to insufficient levels of *Xwnt-8* protein being synthesized from injected RNAs that include the 3' UTR, rather than reflecting true functional differences. Our results are consistent with the possibility that the *Xwnt-8* 3' UTR can negatively regulate transcript stability or translation in vivo in a temporally restricted fashion, beginning after the midblastula stage of development.

### The *Xwnt-8* 3' UTR negatively regulates transcript stability in developing embryos beginning at the early gastrula stage

To directly test whether the 3' UTR of *Xwnt-8* can temporally regulate transcript degradation, we compared the in vivo stability of reporter transcripts that either included (Vim/UTR+) or lacked (Vim/UTR-) the *Xwnt-8* 3' UTR. Each

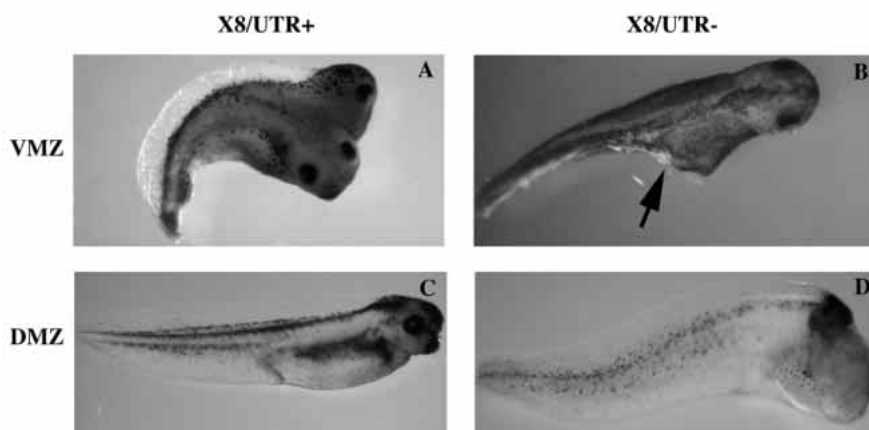

**Fig. 1.** Differential secondary axis induction and inhibition of anterior development by injected *Xwnt-8* RNAs that contain or lack 3' untranslated sequence. *Xwnt-8* RNAs that either include (X8/UTR+; A,C) or lack (X8/UTR-; B,D) 3' untranslated sequence were injected into the dorsal (DMZ) or ventral marginal zone (VMZ) of 4-cell embryos, which were cultured to the tadpole stage and photographed. Arrow in B indicates partial secondary axis.

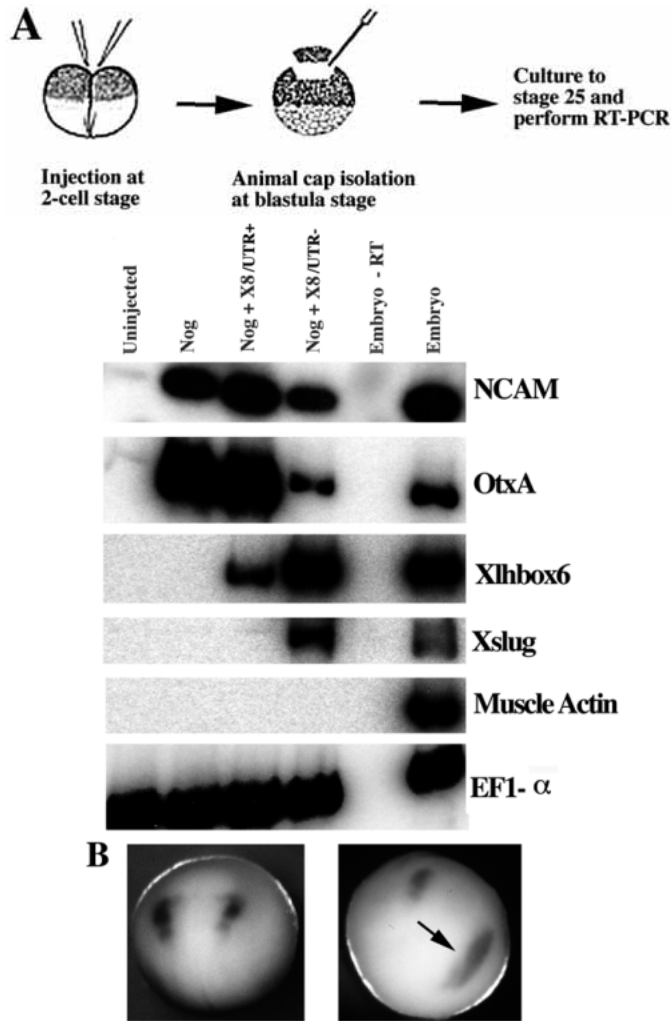

**Fig. 2.** Xwnt-8 RNAs that lack the 3' UTR can posteriorize neural tissue and induce neural crest whereas RNAs that include the 3' UTR cannot. (A) Animal caps were isolated from control (uninjected) embryos or from embryos injected with noggin (Nog) RNA alone, or in combination with X8/UTR+ or X8/UTR- RNAs. Ectodermal explants were cultured to stage 25 and expression of pan-neural (*NCAM*), anterior neural (*OtxA*), posterior neural (*Xlhbox6*), neural crest (*Xslug*), dorsal mesodermal (*muscle actin*) and ubiquitously expressed (*EF1- $\alpha$* ) genes were analyzed by RT-PCR. (B) X8/UTR+ (left panel) or X8/UTR- (right panel) RNA was injected into the animal pole of one blastomere of 2-cell embryos and expression of the neural crest marker *Xtwist* was analyzed by in situ hybridization at stage 18. Arrow indicates expanded domain of *Xtwist* staining.

of these transcripts encodes a non-functional myc-epitope-tagged reporter protein (illustrated above Fig. 3). Vim/UTR- or Vim/UTR+ RNA (500 pg) was injected into 1-cell *Xenopus* embryos and the persistence of each injected transcript was assayed by northern blot analysis of RNA collected from developmentally staged embryos. Roughly equivalent amounts of each RNA were detected shortly after injection (1-cell stage) and Vim/UTR- transcripts persisted at nearly steady state levels at least until stage 17 (Fig. 3). In contrast, although Vim/UTR+ transcripts were stable through the early gastrula stage (stage 10), they were almost completely degraded by the early neurula stage (stage 14). Further analysis demonstrated

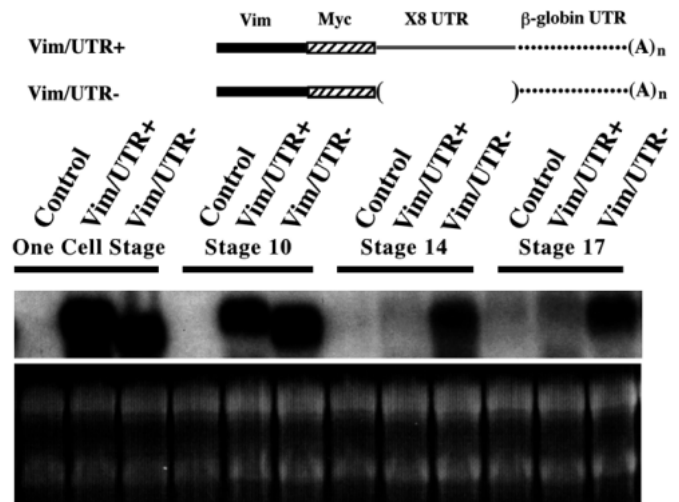

**Fig. 3.** The 3' UTR of Xwnt-8 induces the degradation of a heterologous transcript beginning shortly after the onset of gastrulation. Vim/UTR+ or Vim/UTR- RNA was injected into 1-cell embryos. RNA was extracted from 10 embryos in each experimental group and from uninjected (control) embryos at the indicated developmental stages. A northern blot containing 15  $\mu$ g of each RNA was hybridized with a radiolabeled Vim antisense probe. The Vim probe detects endogenous vimentin RNA and thus signal is observed in control lanes by the late gastrula stage.

that Vim/UTR+ transcripts were rapidly degraded shortly after the onset of gastrulation, becoming nearly undetectable by stage 10.5 (data not shown and Fig. 4). These data demonstrate that elements in the Xwnt-8 3' UTR can destabilize a heterologous transcript in *Xenopus* embryos, beginning at the early gastrula stage.

#### Destabilization of transcripts requires de novo protein synthesis

To determine whether the onset of degradation of Vim/UTR+ transcripts requires new protein synthesis at the gastrula stage, the persistence of injected Vim/UTR- and Vim/UTR+ transcripts was compared in embryos cultured in the absence or presence of cycloheximide (5  $\mu$ g/ml) beginning at the late blastula (stage 9) or early gastrula (stage 10) stages. As shown in Fig. 4, in the absence of cycloheximide (CHX-), Vim/UTR- transcripts persisted at steady state levels throughout gastrulation whereas Vim/UTR+ transcripts remained stable through the early gastrula stage (stage 10) and were rapidly degraded by stage 10.5 (compare VIM signal in lanes 5 and 9). Incubation in cycloheximide beginning at stage 9 blocked degradation of Vim/UTR+ transcripts (compare lanes 9 and 10) while incubation beginning at stage 10 did not (compare lanes 9 and 11).

To determine whether steady state levels of endogenous Xwnt-8 transcripts are altered by inhibition of protein synthesis, the same filter was rehybridized with an antisense Xwnt-8 riboprobe (Fig. 4, Xwnt-8). Incubation in cycloheximide had no effect on the accumulation of endogenous Xwnt-8 transcripts at stage 10, led to a slight increase in accumulation by stage 10.5 (compare lanes 9 and 10, 12 and 13) and to a much larger increase by stage 12.5 (compare lanes 15 and 16, 15 and 17). These results are

**Fig. 4.** *Xwnt-8* 3' UTR-mediated destabilization of transcripts requires de novo protein synthesis. *Vim/UTR+* or *Vim/UTR-* transcripts were injected into 1-cell embryos, which were then cultured in the presence or absence of cycloheximide (CHX) as indicated (CHX:-, absence of CHX; 9, incubated in CHX beginning at stage 9; 10, incubated in CHX beginning at stage 10). RNA was extracted from 10 embryos in each experimental group (RNA: con, uninjected controls; *UTR+*, *Vim/UTR+* injected; *UTR-*, *Vim/UTR-* injected) at the indicated developmental stages and the persistence of injected RNA was assayed by northern blot hybridization using a *Vim* antisense riboprobe (VIM). The same filter was rehybridized with an antisense *Xwnt-8* riboprobe (*Xwnt-8*).

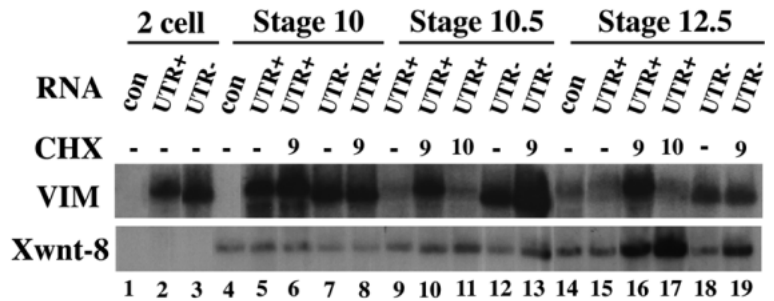

consistent with the possibility that 3' UTR-mediated degradation of *Xwnt-8* transcripts requires a protein(s) that is (are) synthesized shortly before the onset of gastrulation, or that is (are) extremely labile.

**The 3' UTR of *Xwnt-8* negatively regulates translation of reporter RNAs**

To determine whether the 3' UTR of *Xwnt-8* can regulate translation of reporter RNAs, *Vim/UTR+* and *Vim/UTR-* transcripts were injected near the dorsal midline of cleaving embryos and synthesis of epitope-tagged reporter protein was analyzed by whole-mount immunostaining of staged embryos, and by western blot analysis of embryonic extracts, using a monoclonal antibody specific for the myc-epitope. As shown in Fig. 5A, *Vim/UTR-* transcripts were translated to produce abundant immunoreactive protein (arrows) that was readily detected by the blastula stage (stage 7). In contrast, weak or no immunoreactivity was detected in blastula stage embryos injected with *Vim/UTR+* RNA, despite the presence of abundant *Vim/UTR+* transcripts at least until the gastrula stage (Figs 3, 4). Inhibition of translation of *Vim/UTR+* was also apparent when transcripts were targeted to ventral cells or to other regions of the embryo (data not shown). Western blot analysis confirmed that *Vim/UTR-* transcripts were translated in vivo to yield a 55 kDa protein that was readily detected by the blastula stage (stage 7) and persisted at least until the neurula stage (stage 22, Fig. 5B). In contrast, protein generated by translation of *Vim/UTR+* transcripts was only detected when blots were overexposed, being many fold less abundant than protein generated by translation of *Vim/UTR-* (not visible on exposure shown in Fig. 5B). These data show that the 3' UTR of *Xwnt-8* can inhibit the translation of a heterologous reporter RNA in developing *Xenopus* embryos and that this inhibition is not temporally or spatially regulated.

**Identification of sequence elements that negatively regulate RNA stability and translation**

To begin to identify sequence elements in the 3' UTR of *Xwnt-8* that negatively regulate RNA stability or translation, we generated deletion mutant forms of the UTR and analyzed their ability to repress translation and to destabilize reporter transcripts in vivo. The 3' UTR of *Xwnt-8* is 436 nucleotides in length and contains a polyadenylation signal, AAUAAA (Fig. 6A, bold and italicized), upstream of the polyadenylate [poly(A)] tract. Three deletion mutant forms of the UTR, one consisting of nucleotides 30 to 436 (*UTR*, sequence between asterisks in Fig. 6A), a second consisting of nucleotides 92 to 287 (*UTR1*, underlined in Fig. 6A), and a third consisting of nucleotides 132 to 287 (*UTR2*, sequence between arrows in

Fig. 6A) were subcloned downstream of sequence encoding six copies of a myc epitope tag (MT). Synthetic MT RNAs with no UTR, or containing deletion mutant forms of the *Xwnt-8* 3' UTR (illustrated schematically in Fig. 6B) were injected into *Xenopus* embryos and the translation and stability of each transcript was examined by immunostaining and northern blot analysis, respectively, as described in the previous section. MT and MT-*UTR2* transcripts persisted at least until the mid-neurula stage (stage 18) and generated abundant immunoreactive protein at the midblastula stage (Fig. 6B). In contrast, MT-*UTR* and MT-*UTR1* transcripts were rapidly degraded following the onset of gastrulation and immunoreactive protein was rarely detected in embryos injected with these transcripts (Fig. 6B). Transcripts consisting

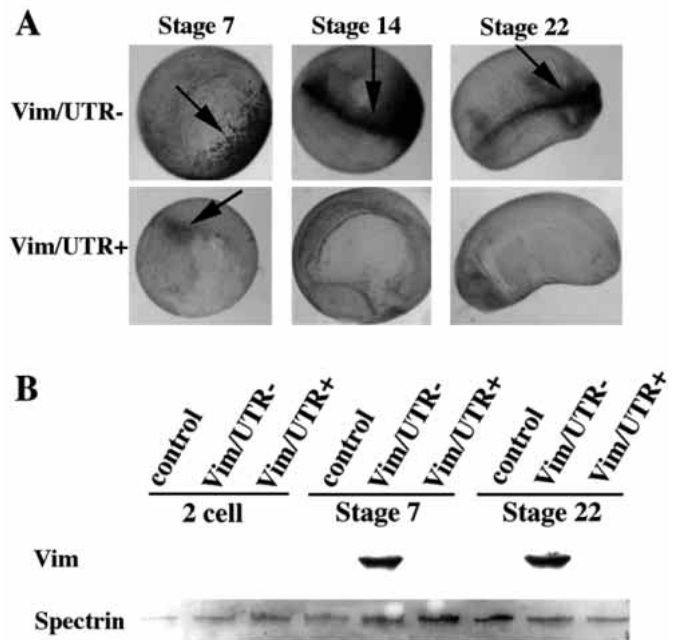

**Fig. 5.** The 3' UTR of *Xwnt-8* inhibits translation of a reporter transcript in developing embryos. (A) *Vim/UTR+* or *Vim/UTR-* RNAs were injected near the dorsal side of cleaving embryos and synthesis of *Vim* protein was analyzed by immunostaining whole embryos at the indicated stages with antiserum specific for the myc-epitope tag present in the *Vim* reporter protein. Arrows indicate specific staining. (B) *Vim/UTR+* or *Vim/UTR-* RNAs were injected into 1-cell embryos and total proteins were extracted from injected and uninjected (control) embryos at the indicated stages. A western blot containing three embryo equivalents of each extract was probed with anti-myc antiserum and was reprobed with an antibody specific for spectrin to demonstrate the presence of fairly equivalent amounts of protein in each lane.

of myc coding sequence followed by ~200 nucleotides of  $\beta$ -globin 3' UTR and then the Xwnt-8 3' UTR behaved identically to MT-UTR transcripts following injection into embryos in that they were degraded following the onset of gastrulation and were poorly translated (data not shown). Thus, negative regulation of MT-UTR transcripts does not require that the Xwnt-8 UTR sequence be located immediately downstream of the myc coding sequence. These studies identify a 194 nucleotide stretch of the Xwnt-8 3' UTR (UTR1) that is sufficient to destabilize and repress translation of reporter transcripts in *Xenopus* embryos, and demonstrate that the first 40 nucleotides of this sequence are essential for this negative regulation.

### The majority of endogenous Xwnt-8 RNAs are not associated with polysomes

The above results demonstrate that elements in the 3' UTR of Xwnt-8 can repress translation of reporter transcripts. We used a polysome recruitment assay to determine whether these same elements inhibit translation of endogenous Xwnt-8 transcripts. As shown in Fig. 7A, the majority of endogenous Xwnt-8 transcripts were found in the non-polysomal (supernatant) fraction, suggesting that Xwnt-8 RNA is inefficiently translated in vivo. As a positive control, we also analyzed polysomal recruitment of MT-UTR2 RNA following injection into *Xenopus* embryos. MT-UTR2 transcripts were found solely in polysomal fractions (Fig. 7B), consistent with our previous finding that the portion of the Xwnt-8 3' UTR contained in MT-UTR2 is not sufficient to repress translation. In all experiments, addition of EDTA led to the release of transcripts from polyribosomal pools. These results are consistent with the hypothesis that sequence elements in the 3' UTR of endogenous Xwnt-8 transcripts inhibit translation of these mRNAs in vivo.

### Transcripts containing the 3' UTR of Xwnt-8 have a short poly(A) tail

One mechanism by which UTRs of RNAs control transcript stability and/or translation is by regulating the length of the 3' poly(A) tail (Jacobson and Peltz, 1996). We used a PCR-based poly(A) assay (Robbie et al., 1995, illustrated schematically in Fig. 8A) to determine whether the Xwnt-8 3' UTR can regulate polyadenylation of reporter transcripts and to assay the polyadenylation status of endogenous Xwnt-8 transcripts. Given that UTR1, but not UTR2, confers early degradation and blocks translation of a reporter transcript (Fig. 6B), we compared the polyadenylation status of MT-UTR1 and MT-UTR2 transcripts following injection into *Xenopus* embryos. As shown in Fig. 8B, amplification of MT-UTR1 cDNAs produced a single compact band of PCR products, consistent with the presence of a short poly(A) tail. In contrast, amplification of MT-UTR2 yielded a heterogeneous smear of products that range in size up to several hundred nucleotides longer than the MT-UTR1 products, consistent with the presence of a long poly(A) tail. RT-PCR analysis of endogenous Xwnt-8 transcripts yielded a single compact band at all developmental stages that *Xwnt-8* is expressed (Fig. 8C), suggesting

that these transcripts possess a short poly(A) tail. These results are consistent with the hypothesis that elements in the Xwnt-8 3' UTR repress translation and destabilize RNAs by repressing polyadenylation or by promoting deadenylation.

### 3' UTR-mediated degradation of Xwnt-8 RNA is essential for normal patterning of somites

Endogenous Xwnt-8 transcripts are present in ventral and lateral mesodermal cells during gastrulation but are rapidly downregulated in lateral cells, which will give rise to the somites, shortly thereafter (Christian and Moon, 1993, illustrated schematically above Fig. 9, Xwnt-8-expressing cells shaded pink, regions fated to form somites hatched). To begin to test whether this downregulation involves UTR-mediated destabilization of endogenous transcripts, we asked whether ectopic expression of an RNA that is complementary to the regulatory region of the Xwnt-8 3' UTR (UTR1) leads to prolonged expression of endogenous Xwnt-8 transcripts in presomitic mesodermal cells. Antisense UTR1 RNA or, as a

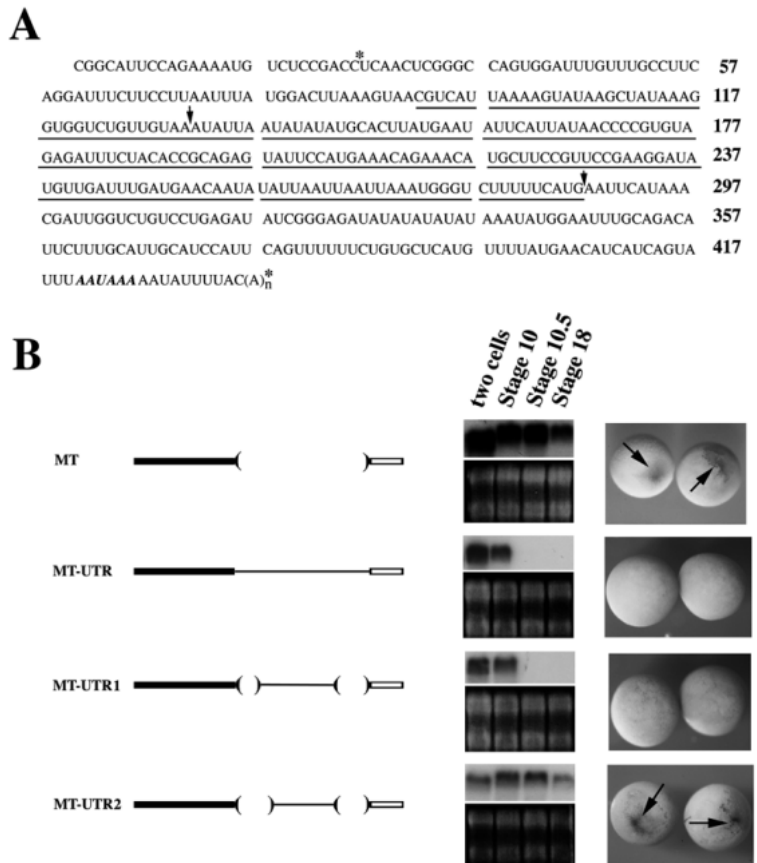

**Fig. 6.** Deletion analysis of the Xwnt-8 3' UTR identifies a 194 nucleotide regulatory region. (A) Nucleotide sequence of the Xwnt-8 3' UTR with deletion mutant forms indicated. UTR consists of sequence between asterisks, sequence contained in UTR1 is underlined and UTR2 consists of sequence between the two arrows. (B) Reporter RNAs used to test the function of the three deletion mutants indicated in A are shown schematically. Black box represents myc coding sequence; black line, Xwnt-8 3' UTR; open box, SV40 polyadenylation signal. Reporter RNAs were injected into 1-cell *Xenopus* embryos and postgastrula stage stability and midblastula stage translation were assayed by northern analysis and whole-mount immunostaining as described in the legends to Figs 3 and 5.

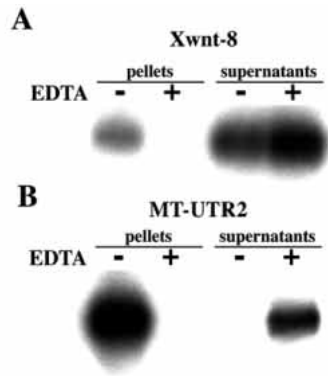

**Fig. 7.** Endogenous *Xwnt-8* RNA is inefficiently translated. (A) RNA from stage 11 embryos was separated into polysomal (pellet) and non-polysomal (supernatant) fractions. As a control, some samples were adjusted to 20 mM EDTA, which dissociates RNA from ribosomes. The presence of *Xwnt-8* transcripts in each fraction was analyzed by northern blot hybridization. (B) Northern blot analysis of RNA extracted from MT/UTR2-injected embryos at stage 9 and separated into polysomal and non-polysomal fractions.

negative control, UTR2 RNA (1 ng) was co-injected together with RNA encoding  $\beta$ -galactosidase (which serves as a lineage tracer) near the dorsolateral marginal zone on one side of 4-cell embryos, as indicated in the schematic above Fig. 9. This targets the transcripts primarily to somitic mesoderm (hatched in schematic) on one side of the embryo. Injected embryos were stained for  $\beta$ -galactosidase activity at the mid-neurula stage (stage 18), following which endogenous *Xwnt-8* transcripts were detected by whole-mount in situ hybridization. Embryos injected with antisense UTR2 RNA showed expression of *Xwnt-8* in a subset of neural cells (Fig. 9A,A', arrowheads) and in ventral mesodermal cells (not visible in dorsal view), as did uninjected embryos (data not shown). Embryos injected with antisense UTR1 showed *Xwnt-8* staining in ventral and neural (Fig. 9A,B',C', arrowheads) cells but *Xwnt-8* transcripts were also detected in dorsolateral (somitic) mesodermal cells on the  $\beta$ -galactosidase-expressing side of many embryos (Fig. 9A,B',C', arrows). This result is consistent with the hypothesis that UTR-mediated destabilization of *Xwnt-8* transcripts is essential for downregulation of *Xwnt-8* expression in somitic mesoderm following gastrulation.

To determine whether post-transcriptional downregulation of *Xwnt-8* expression is necessary for normal patterning of the somites, we analyzed differentiation of one somitic derivative, namely muscle, in embryos in which expression of *Xwnt-8* was upregulated by unilateral targeted injection of antisense UTR1 RNA, or by injection of an *Xwnt-8* expression plasmid. Embryos were injected as described above, cultured to stage 32, stained for  $\beta$ -galactosidase activity, immunostained with a muscle-specific antibody, embedded in paraffin and sectioned for histological analysis. Embryos injected with antisense UTR2 RNA formed bilaterally symmetric blocks of muscle (Fig. 9B, left panel) on the injected (arrow) and uninjected (arrowhead) side of the embryo at all anterior-posterior levels that were examined. In contrast, in a subset of embryos made to express antisense UTR1 RNA, the myotome was larger on the injected side of the embryo (Fig. 9, right panel, arrow) relative to that on the uninjected side (arrowhead). An identical

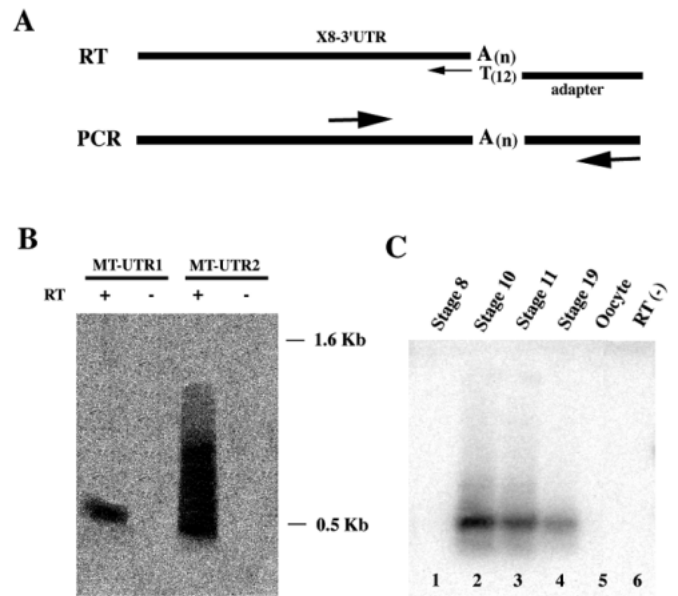

**Fig. 8.** RNAs bearing the *Xwnt-8* 3' UTR have a short poly(A) tail. (A) RT-PCR assay for poly(A) tail length. RNA was reverse transcribed using an oligo(dT)/adapter primer and the resultant cDNA amplified using primers that anneal to the 3' adapter sequence and sequence in the *Xwnt-8* 3' UTR. Specific products were detected by hybridizing Southern blots with a radiolabeled *Xwnt-8* UTR probe. (B) MT-UTR1 or MT-UTR2 transcripts were injected into *Xenopus* embryos and the poly(A) tail length of each transcript was assayed by RT-PCR amplification of RNAs extracted from injected embryos at stage 9 in the presence (+) or absence (-) of reverse transcriptase (RT). (C) RT-PCR analysis of poly(A) tail length of endogenous *Xwnt-8* transcripts at the indicated developmental stages.

unilateral enlargement of the myotome was observed following injection of an *Xwnt-8* expression plasmid that lacks the 3' UTR, but was not observed following injection of an identical expression plasmid that includes UTR sequence (data not shown). These results suggest that rapid, 3' UTR-mediated degradation of endogenous *Xwnt-8* transcripts in the somitic mesoderm following gastrulation is essential to prevent overcommitment of these cells to a myogenic fate.

## DISCUSSION

### Negative post-transcriptional regulation of *Xwnt-8* expression mediated by novel sequence elements in the 3' UTR of *Xwnt-8* RNAs

In this study, we have investigated the role of post-transcriptional regulatory mechanisms in controlling embryonic expression of the zgotically transcribed gene, *Xwnt-8*. Our results demonstrate that elements in the 3' UTR of *Xwnt-8* RNAs negatively regulate adenylation, repress translation and lead to stage-specific degradation of transcripts.

Regulation of RNA stability is a feature of many transiently expressed genes, including maternally expressed embryonic genes (reviewed by Wickens et al., 1997). The mechanism by which such transcripts are targeted for degradation, and the sequence elements that control their stability, have been studied

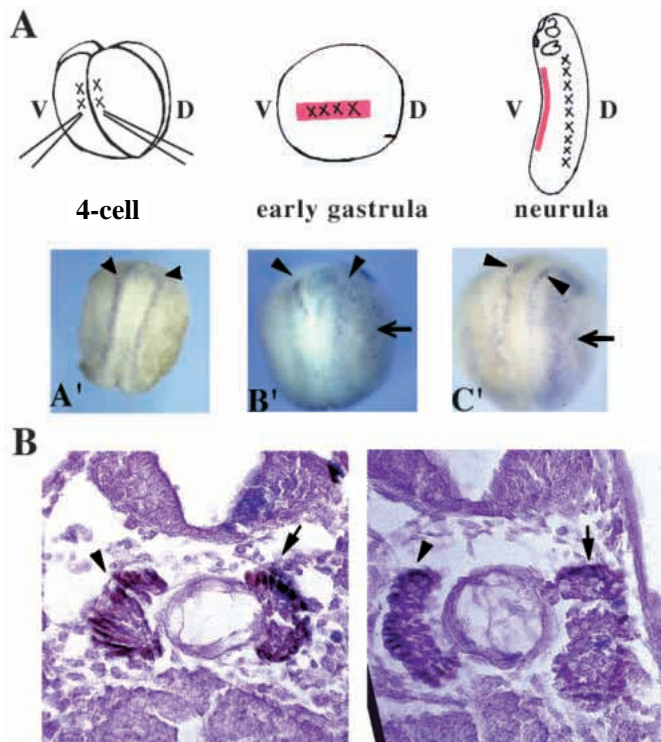

**Fig. 9.** UTR-mediated degradation of endogenous Xwnt-8 transcripts is required for normal myogenesis. (A) Synthetic RNAs complementary to UTR2 (A') or UTR1 (B',C') were co-injected with  $\beta$ -galactosidase RNA into the dorsolateral marginal zone on one side of 4-cell embryos as illustrated. This injection targets transcripts to regions of the embryo fated to form somites (hatched) on one side of the body. Embryos were stained for  $\beta$ -galactosidase activity (light blue stain) and then hybridized with digoxigenin-labeled Xwnt-8 probe (purple stain). Staining of Xwnt-8 positive cells in the central nervous system (arrowheads) and dorsolateral regions (arrows) is indicated. (B) Embryos were injected with antisense UTR2 (left panel) or UTR1 (right panel) RNAs as illustrated in A, cultured to the tailbud stage, stained for  $\beta$ -galactosidase (blue) and then immunostained with a muscle specific antibody (brown stain). Paraffin sections of stained embryos are shown. Blocks of muscle on the injected (arrow) and uninjected (arrowhead) side of each embryo are indicated.

extensively. Two of the best-characterized determinants of RNA instability in vertebrate organisms are the AU-rich element (ARE), found in RNAs encoding many short-lived cytokines and oncoproteins, and the embryo deadenylation element (EDEN) that directs degradation of a class of maternally encoded RNAs in *Xenopus* embryos. AREs and EDENs are located in the 3' UTR of transcripts and both direct deadenylation as the first step in RNA decay. AREs are characterized by the presence of one or more AUUUA motif (reviewed by Jacobson and Peltz, 1996) while the EDEN is composed of a minimum of four UA/G repeats (Audic et al., 1998; Paillard et al., 1998).

Given that Xwnt-8 transcripts are deadenylated and destabilized by elements in the 3' UTR, it is possible that this represents an EDEN- or ARE-mediated event. The Xwnt-8 RNA contains a potential EDEN motif [(UA)<sub>6</sub>; residues 327-338 in Fig. 6A] as well as a potential ARE (AUUUA, residues 417-421 in Fig. 6A) within the 3' UTR. Neither of these motifs

is required for deadenylation or degradation, however, since MT-UTR1 RNAs, which lack these sequences, are not adenylated and are rapidly degraded during gastrulation. A second potential EDEN [(UA/G)<sub>4</sub>, residues 139-146 in Fig. 6A] is located within the portion of the Xwnt-8 3' UTR included in MT-UTR1 transcripts, consistent with the possibility that it contributes to the instability of this transcript. This EDEN, however, is not sufficient to mediate instability since it is also contained within MT-UTR2 transcripts, which have a long poly(A) tail and remain stable throughout development. Together, our results suggest that Xwnt-8 transcripts contain a novel instability determinant(s).

Xwnt-8 3' UTR-mediated deadenylation (or inhibition of adenylation) of transcripts is temporally uncoupled from their degradation, as evidenced by the fact that deadenylation of reporter transcripts is apparent many hours prior to the time that these RNAs are degraded. A similar uncoupling of deadenylation and degradation of maternally encoded RNAs in *Xenopus* embryos has been reported. Specifically, reporter transcripts bearing either an ARE (Voeltz and Steitz, 1998) or an EDEN (Paris et al., 1988; Duval et al., 1990) are deadenylated immediately after fertilization but remain stable until the MBT. Synthetic RNAs that are injected into embryos as poly(A)<sup>-</sup> transcripts are also protected from degradation until the MBT, thereby demonstrating that post-MBT degradation is dependent solely on deadenylation, and does not require specific sequence information (Audic et al., 1998). It is possible that a component of the degradation machinery is first expressed at the MBT.

Although Xwnt-8 3' UTR-mediated transcript degradation is mechanistically similar to that of previously characterized maternal transcripts, the timing of transcript degradation is quite different. In *Xenopus* degradation of deadenylated maternal transcripts begins shortly after the MBT (Paris et al., 1988; Duval et al., 1990), which occurs at 6-7 hours postfertilization. In contrast, reporter transcripts bearing the Xwnt-8 3' UTR remain stable through the onset of gastrulation and are then rapidly degraded at approximately 11 hours of development (stage 10.5). The observation that inhibition of protein synthesis does not affect accumulation of endogenous Xwnt-8 transcripts until stage 10.5 suggests that endogenous Xwnt-8 transcripts are similarly stable until gastrulation begins. This delay in the onset of degradation of Xwnt-8 transcripts, relative to that of maternal transcripts, may be critical for normal patterning. Specifically, transcription of the Xwnt-8 gene initiates shortly after the MBT (Christian et al., 1991), and normal patterning of prospective ventral and lateral mesoderm requires that sufficient Xwnt-8 protein accumulate within these cells to activate the Wnt signal transduction pathway (Hoppler et al., 1996). Since Xwnt-8 transcripts are inefficiently translated (most likely due to their short poly(A) tail), a mechanism that operates to delay rapid turnover of these RNAs for several hours may be critical to enable transcripts to accumulate to high-enough levels to generate sufficient protein for normal patterning. It is possible that sequence elements in the Xwnt-8 3' UTR protect the deadenylated transcripts from the default pathway of rapid degradation at the MBT.

#### Destabilization of Xwnt-8 transcripts requires ongoing protein synthesis

Inhibitors of protein synthesis have been shown to stabilize a variety of labile RNAs in mammalian cells (reviewed by Sachs,



1993; Ross, 1997) and in *Xenopus* (Duval et al., 1990), and several explanations for this phenomena have been put forth. Firstly, it has been hypothesized that nucleases or other factors involved in degradation are ribosome-associated and that ongoing translation of an RNA is required for its breakdown. This explanation is unlikely to account for stabilization of *Xwnt-8* transcripts in the presence of cycloheximide since the majority of these RNAs are not associated with polyribosomes. Secondly, it is possible that degradation of *Xwnt-8* transcripts is mediated by a newly synthesized protein encoded by an RNA that is first translated at the onset of gastrulation at stage 10. This also does not seem highly probable since endogenous *Xwnt-8* transcripts are stabilized even when the translation inhibitor is applied beginning at the mid-gastrula stage (stage 11.5, Christian, unpublished data). Finally, the rapid turnover of *Xwnt-8* transcripts may require a highly labile RNA-degrading factor.

### Mechanism of antisense-mediated stabilization of endogenous *Xwnt-8* transcripts

The mechanism by which ectopically expressed RNAs complementary to the *Xwnt-8* 3' UTR stabilize endogenous *Xwnt-8* transcripts is unknown. Previous studies have shown that addition of antisense RNAs corresponding to regulatory regions in the 3' UTRs of translationally repressed transcripts in clam oocytes can alleviate this repression (Standart and Hunt, 1990). In this case, the antisense transcripts are presumed to form a complex with the UTR and thereby prevent the binding of proteins that mediate translational repression. The same mechanism may explain the observed antisense-mediated stabilization of *Xwnt-8* transcripts in *Xenopus*. Although antisense RNA approaches to perturbing gene function have been problematic in *Xenopus* embryos due to the presence of a double-stranded RNA deaminase that unwinds and chemically modifies RNA: RNA duplexes (reviewed by Walder, 1988), this technique has been used successfully in some cases (Giebelhaus et al., 1988; Sasai et al., 1995; Steinbeisser et al., 1995).

### Destabilization of *Xwnt-8* transcripts is required for normal patterning of somites

Our results demonstrating that inhibition of UTR-mediated destabilization of *Xwnt-8* transcripts leads to an overcommitment of somitic cells to a myogenic fate are consistent with previous studies showing that dorsally restricted Wnt signals are involved in formation of the dermomyotome (reviewed by Yamaguchi, 1997). Myogenic fate is specified by a cascade of inductive and patterning signals. In *Xenopus*, the first set of signals operates during gastrulation when BMP antagonists are secreted by organizer cells and dorsalize adjacent lateral (presomitic) mesoderm. In the absence of these signals, lateral mesoderm adopts a more ventral fate and is unable to form muscle (reviewed by Harland and Gerhart, 1997). *Xwnt-8* is expressed throughout the presumptive ventrolateral mesoderm during this time and antagonizes dorsalizing signals provided by the organizer (Christian and Moon, 1993). In the absence of *Xwnt-8* function, lateral mesodermal cells fail to express early markers of myogenic fate and muscle differentiation is repressed while a more dorsal mesodermal derivative, the notochord, is expanded (Hoppler et al., 1996). Thus, *Xwnt-8* is required for

the initial specification of presomitic fate during gastrulation. Following gastrulation, *Xwnt-8* is no longer expressed in the paraxial mesoderm, although expression in the ventral mesoderm persists.

In addition to specifying presomitic fate, *Wnts* participate in the subsequent dorsoventral patterning of the segmental blocks of paraxial mesoderm, the somites, from which skeletal muscle is derived. During neurulation, individual somites begin to segregate away from the presomitic mesoderm and are patterned along their dorsoventral axis by signals originating from adjacent tissues, such as the neural tube and notochord (reviewed by Yamaguchi, 1997). The ventral portion of each somite will give rise to sclerotome, the source of cartilage, while the dorsal portion of each somite will form the dermomyotome and give rise to muscle precursors and other cell types. Sonic hedgehog, secreted from the notochord and floor plate, is required for formation of the sclerotome (Chiang et al., 1996) while Wnt-1 and Wnt-3a, secreted from the dorsal neural tube, play an essential role in the formation of the dermomyotome (Ikeya and Takada, 1998).

Given that dorsally restricted Wnt signals are required for formation of the dermomyotome during neurulation, it is understandable that prolonged expression of *Xwnt-8* throughout the somitic mesoderm leads to an overcommitment to myogenic fate. Indeed, previous studies have shown that ectopic expression of Wnt-1 within the presomitic mesoderm during the time that somites are being patterned causes an expansion of the dermomyotome and represses sclerotome formation (Capdevila et al., 1998). Thus, although *Xwnt-8* is required in presomitic mesodermal cells during gastrulation, it must be rapidly cleared from these same cells following this period. Our results demonstrate that transcriptional downregulation of expression of *Xwnt-8* within the early mesoderm is not sufficient to allow proper patterning of the somites and reveal an essential role for regulated RNA stability and/or translation in this process.

We thank R.T. Moon for the anti-spectrin antibody and D. Turner for pCS2+ and pCS2+MT plasmids. The 12/101 monoclonal antibody was obtained from the Developmental Studies Hybridoma Bank maintained by the Department of Pharmacology and Molecular Sciences, Johns Hopkins University and the Department of Biology, University of Iowa, under Contract N01-HD-2-3144 from the NICHD. This work was supported by grants from the NIH (HD31087 and HD01167) to J. L. C.

## REFERENCES

- Audic, Y., Omilli, F. and Osborne, H. B. (1998). Embryo deadenylation element-dependent deadenylation is enhanced by a cis element containing AUU repeats. *Mol. Cell Biol.* **18**, 6879-84.
- Brown, J. D. and Moon, R. T. (1998). Wnt signaling: why is everything so negative? *Curr. Opin. Cell Biol.* **10**, 182-7.
- Capdevila, J., Tabin, C. and Johnson, R. L. (1998). Control of dorsoventral somite patterning by Wnt-1 and beta-catenin. *Dev. Biol.* **193**, 182-94.
- Chang, C. and Hemmati-Brivanlou, A. (1998). Neural crest induction by *Xwnt7B* in *Xenopus*. *Dev. Biol.* **194**, 129-34.
- Chiang, C., Litingtung, Y., Lee, E., Young, K. E., Corden, J. L., Westphal, H. and Beachy, P. A. (1996). Cyclopia and defective axial patterning in mice lacking Sonic hedgehog gene function. *Nature* **383**, 407-13.
- Christian, J. L., Edelstein, N. G. and Moon, R. T. (1990). Overexpression of wild-type and dominant negative mutant vimentin subunits in developing *Xenopus* embryos. *New Biol.* **2**, 700-11.

- Christian, J. L., McMahon, J. A., McMahon, A. P. and Moon, R. T.** (1991). Xwnt-8, a *Xenopus* Wnt-1/int-1-related gene responsive to mesoderm-inducing growth factors, may play a role in ventral mesodermal patterning during embryogenesis. *Development* **111**, 1045-55.
- Christian, J. L. and Moon, R. T.** (1993). Interactions between Xwnt-8 and Spemann organizer signaling pathways generate dorsoventral pattern in the embryonic mesoderm of *Xenopus*. *Genes Dev.* **7**, 13-28.
- Cui, Y., Tian, Q. and Christian, J. L.** (1996). Synergistic effects of Vg1 and Wnt signals in the specification of dorsal mesoderm and endoderm. *Dev. Biol.* **180**, 22-34.
- Duval, C., Bouvet, P., Omilli, F., Roghi, C., Dorel, C., LeGuellec, R., Paris, J. and Osborne, H. B.** (1990). Stability of maternal mRNA in *Xenopus* embryos: role of transcription and translation. *Mol. Cell Biol.* **10**, 4123-9.
- Giebelhaus, D. H., Eib, D. W. and Moon, R. T.** (1988). Antisense RNA inhibits expression of membrane skeleton protein 4.1 during embryonic development of *Xenopus*. *Cell* **53**, 601-15.
- Harland, R. and Gerhart, J.** (1997). Formation and function of Spemann's organizer. *Annu. Rev. Cell Dev. Biol.* **13**, 611-667.
- Hoppler, S., Brown, J. D. and Moon, R. T.** (1996). Expression of a dominant-negative Wnt blocks induction of MyoD in *Xenopus* embryos. *Genes Dev.* **10**, 2805-17.
- Hoppler, S. and Moon, R. T.** (1998). BMP-2/-4 and Wnt-8 cooperatively pattern the *Xenopus* mesoderm. *Mech. Dev.* **71**, 119-29.
- Ikeya, M., Lee, S. M., Johnson, J. E., McMahon, A. P. and Takada, S.** (1997). Wnt signalling required for expansion of neural crest and CNS progenitors. *Nature* **389**, 966-70.
- Ikeya, M. and Takada, S.** (1998). Wnt signaling from the dorsal neural tube is required for the formation of the medial dermomyotome. *Development* **125**, 4969-76.
- Jacobson, A. and Peltz, S. W.** (1996). Interrelationships of the pathways of mRNA decay and translation in eukaryotic cells. *Annu. Rev. Biochem.* **65**, 693-739.
- Kadowaki, T., Wilder, E., Klingensmith, J., Zachary, K. and Perrimon, N.** (1996). The segment polarity gene porcupine encodes a putative multitransmembrane protein involved in Wingless processing. *Genes Dev.* **10**, 3116-28.
- LaBonne, C. and Bronner-Fraser, M.** (1998). Neural crest induction in *Xenopus*: evidence for a two-signal model. *Development* **125**, 2403-14.
- McGrew, L. L., Lai, C. J. and Moon, R. T.** (1995). Specification of the anteroposterior neural axis through synergistic interaction of the Wnt signaling cascade with noggin and follistatin. *Dev. Biol.* **172**, 337-42.
- McMahon, A. P. and Bradley, A.** (1990). The Wnt-1 (int-1) proto-oncogene is required for development of a large region of the mouse brain. *Cell* **62**, 1073-85.
- Moon, R. T., Brown, J. D. and Torres, M.** (1997). WNTs modulate cell fate and behavior during vertebrate development. *Trends Genet.* **13**, 157-62.
- Moon, R. T. and Christian, J. L.** (1989). Microinjection and expression of synthetic mRNAs in *Xenopus* embryos. *Technique* **1**, 76-89.
- Nakayama, T., Snyder, M. A., Grewal, S. S., Tsuneizumi, K., Tabata, T. and Christian, J. L.** (1998). Smad8 acts downstream of BMP-4 to modulate its activity during vertebrate embryonic patterning. *Development* **125**, 857-867.
- Nieuwkoop, P. D. and Faber, J.** (1967). *Normal Table of Xenopus laevis*. (Amsterdam: North Holland Publishing Co.).
- Paillard, L., Omilli, F., Legagneux, V., Bassez, T., Maniey, D. and Osborne, H. B.** (1998). EDEN and EDEN-BP, a cis element and an associated factor that mediate sequence-specific mRNA deadenylation in *Xenopus* embryos. *EMBO J* **17**, 278-87.
- Paris, J., Osborne, H. B., Couturier, A., Le Guellec, R. and Philippe, M.** (1988). Changes in the polyadenylation of specific stable RNA during the early development of *Xenopus laevis*. *Gene* **72**, 169-76.
- Parr, B. A. and McMahon, A. P.** (1994). Wnt genes and vertebrate development. *Curr. Opin. Genet. Dev.* **4**, 523-8.
- Robbie, E. P., Peterson, M., Amaya, E. and Musci, T. J.** (1995). Temporal regulation of the *Xenopus* FGF receptor in development: a translation inhibitory element in the 3' untranslated region. *Development* **121**, 1775-85.
- Ross, J.** (1997). A hypothesis to explain why translation inhibitors stabilize mRNAs in mammalian cells: mRNA stability and mitosis. *BioEssays* **19**, 527-9.
- Sachs, A. B.** (1993). Messenger RNA degradation in eukaryotes. *Cell* **74**, 413-21.
- Saint-Jeannet, J. P., He, X., Varmus, H. E. and Dawid, I. B.** (1997). Regulation of dorsal fate in the neuraxis by Wnt-1 and Wnt-3a. *Proc. Natl Acad. Sci. USA* **94**, 13713-8.
- Sasai, Y., Lu, B., Steinbeisser, H. and De Robertis, E. M.** (1995). Regulation of neural induction by the Chd and Bmp-4 antagonistic patterning signals in *Xenopus*. *Nature* **377**, 757.
- Smith, W. C. and Harland, R. M.** (1991). Injected Xwnt-8 RNA acts early in *Xenopus* embryos to promote formation of a vegetal dorsalizing center. *Cell* **67**, 753-65.
- Sokol, S., Christian, J. L., Moon, R. T. and Melton, D. A.** (1991). Injected Wnt RNA induces a complete body axis in *Xenopus* embryos. *Cell* **67**, 741-52.
- Standart, N. and Hunt, T.** (1990). Control of translation of masked mRNAs in clam oocytes. *Enzyme* **44**, 106-19.
- Steinbeisser, H., Fainsod, A., Niehrs, C., Sasai, Y. and De Robertis, E. M.** (1995). The role of gsc and BMP-4 in dorsal-ventral patterning of the marginal zone in *Xenopus*: a loss-of-function study using antisense RNA. *EMBO J* **14**, 5230-43.
- Takada, S., Stark, K. L., Shea, M. J., Vassileva, G., McMahon, J. A. and McMahon, A. P.** (1994). Wnt-3a regulates somite and tailbud formation in the mouse embryo. *Genes Dev.* **8**, 174-89.
- Thomas, K. R. and Capecchi, M. R.** (1990). Targeted disruption of the murine int-1 proto-oncogene resulting in severe abnormalities in midbrain and cerebellar development. *Nature* **346**, 847-50.
- Turner, D. L. and Weintraub, H.** (1994). Expression of achaete-scute homolog 3 in *Xenopus* embryos converts ectodermal cells to a neural fate. *Genes Dev.* **8**, 1434-47.
- Voeltz, G. K. and Steitz, J. A.** (1998). AUUUA sequences direct mRNA deadenylation uncoupled from decay during *Xenopus* early development. *Mol. Cell Biol.* **18**, 7537-45.
- Walder, J.** (1988). Antisense DNA and RNA: progress and prospects. *Genes Dev.* **2**, 502-4.
- Wickens, M., Anderson, P. and Jackson, R. J.** (1997). Life and death in the cytoplasm: messages from the 3' end. *Curr. Opin. Genet. Dev.* **7**, 220-32.
- Wodarz, A. and Nusse, R.** (1998). Mechanisms of Wnt signaling in development. *Annu. Rev. Cell Dev. Biol.* **14**, 59-88.
- Yamaguchi, T. P.** (1997). New insights into segmentation and patterning during vertebrate somitogenesis. *Curr. Opin. Genet. Dev.* **7**, 513-8.
